# Supplementary material for: Adipocyte inflammation is the primary driver of hepatic insulin resistance in a human iPSC-based microphysiological system
Source: PubMed Central journal article supplement (PMC11393072; doi:10.1038/s41467-024-52258-w), 2024-09-12
Supplement: 41467_2024_52258_MOESM1_ESM.pdf [file 41467_2024_52258_MOESM1_ESM.pdf]

## Supplementary Information

### **Adipocyte inflammation is the primary driver of hepatic insulin resistance in a human iPSC-based microphysiological system**

Lin Qi<sup>+1</sup>, Marko Groeger<sup>+2</sup>, Aditi Sharma<sup>3</sup>, Ishan Goswami<sup>4</sup>, Erzhen Chen<sup>1</sup>, Fenmiao Zhong<sup>1</sup>, Apsara Ram<sup>3</sup>, Kevin Healy<sup>4,5</sup>, Edward C. Hsiao<sup>3</sup>, Holger Willenbring<sup>\*,2</sup>, Andreas Stahl<sup>\*,1</sup>

<sup>+</sup>Authors contributed equally to this paper

<sup>\*</sup>Correspondence to: Holger Willenbring ([holger.willenbring@ucsf.edu](mailto:holger.willenbring@ucsf.edu)) and Andreas Stahl ([astahl@berkeley.edu](mailto:astahl@berkeley.edu))

#### **Table of Content:**

Supplementary Figure 1. iADIPO-iHEP transwell co-culture.

Supplementary Figure 2. PDMS absorption in cell-free MPS.

Supplementary Figure 3. Specific effects of iMACs and iADIPOs on iHEP-MPS.

Supplementary Figure 4. Effects of semaglutide treatment on individual cell types.

Supplementary Figure 5. *GLP1R* expression in iPSC-derived and primary human cells.

Supplementary Table 1. Primers for qRT-PCR.

Supplementary Table 2. RNA yield from 1 well of a 6-well tissue culture plate and 1 MPS.

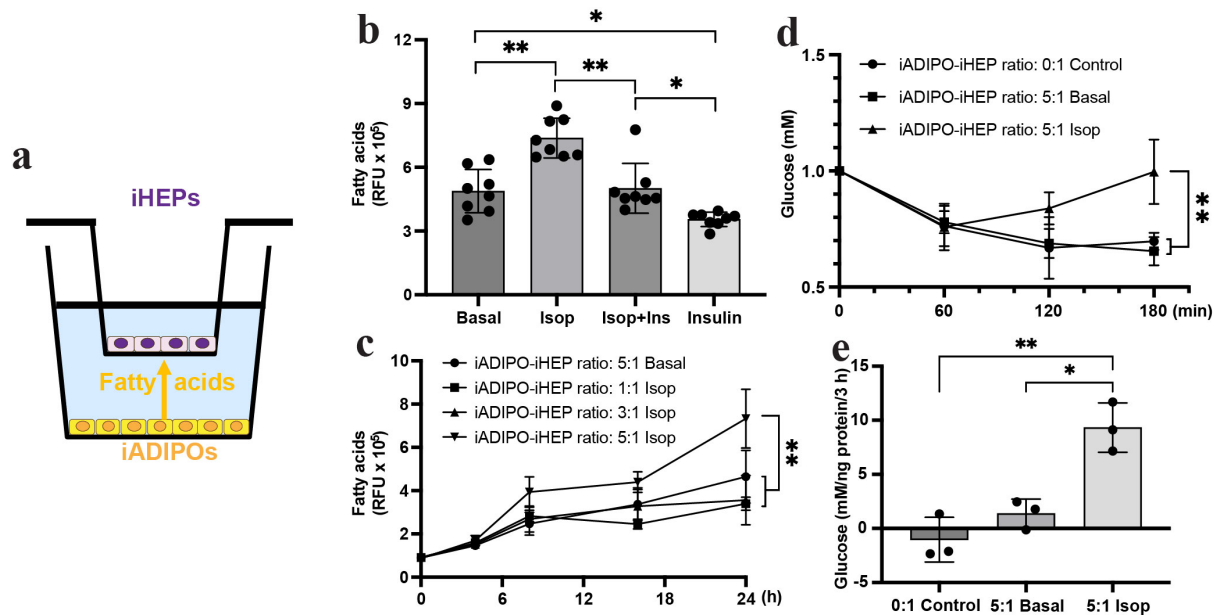

**Supplementary Figure 1. iADIPO-iHEP transwell co-culture.** (a) Schematic of transwell co-culture of iHEPs and iADIPOs. (b) Isoproterenol (Isop)-induced release of fatty acids into media by iADIPOs with and without insulin stimulation.  $n=8$  referring to media. (c) Time course of fatty acid uptake into iHEPs co-cultured with iADIPOs.  $n=3$  referring to iHEPs. (d) Time course of glucose release into media of insulin-stimulated iHEPs after co-culture with iADIPOs. Insulin was added at the beginning (0 minutes, min).  $n=4$  referring to media. (e) Normalized glucose release into media by iHEPs after 3 hours (h) of insulin stimulation after co-culture with iADIPOs.  $n=3$  referring to media. All data are mean  $\pm$  SD.  $p$ -values were calculated by one-way ANOVA followed by Tukey's test in (b,e) and two-way ANOVA then Tukey's test in (c,d). \* $p<0.05$ ; \*\* $p<0.005$ . Statistical methods and exact  $p$ -values are shown in Supplementary Data 1. Source data are provided as Source Data file.

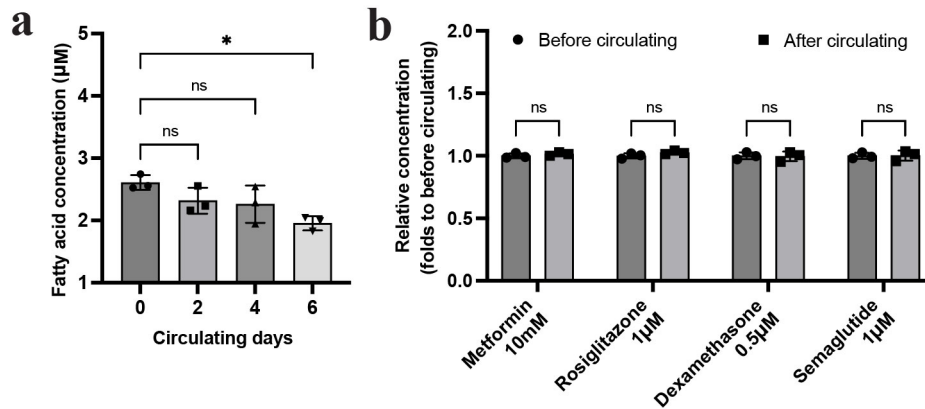

**Supplementary Figure 2. PDMS absorption in cell-free MPS.** (a) Fluorescent fatty acid concentrations in media circulating for up to 6 days.  $n=3$  referring to media.  $p$ -values were determined by one-way ANOVA followed by Dunnett's test by comparing circulating days to day 0. (b) Relative drug concentrations in media before and after circulation for 48 hours.  $n=3$  referring to media.  $p$ -values were determined by unpaired two-tailed  $t$ -tests. \* $p<0.05$ ; \*\* $p<0.005$ ; ns,  $p>0.05$ . All data are mean  $\pm$  SD. Statistical methods and exact  $p$ -values are shown in Supplementary Data 1. Source data are provided as Source Data file.

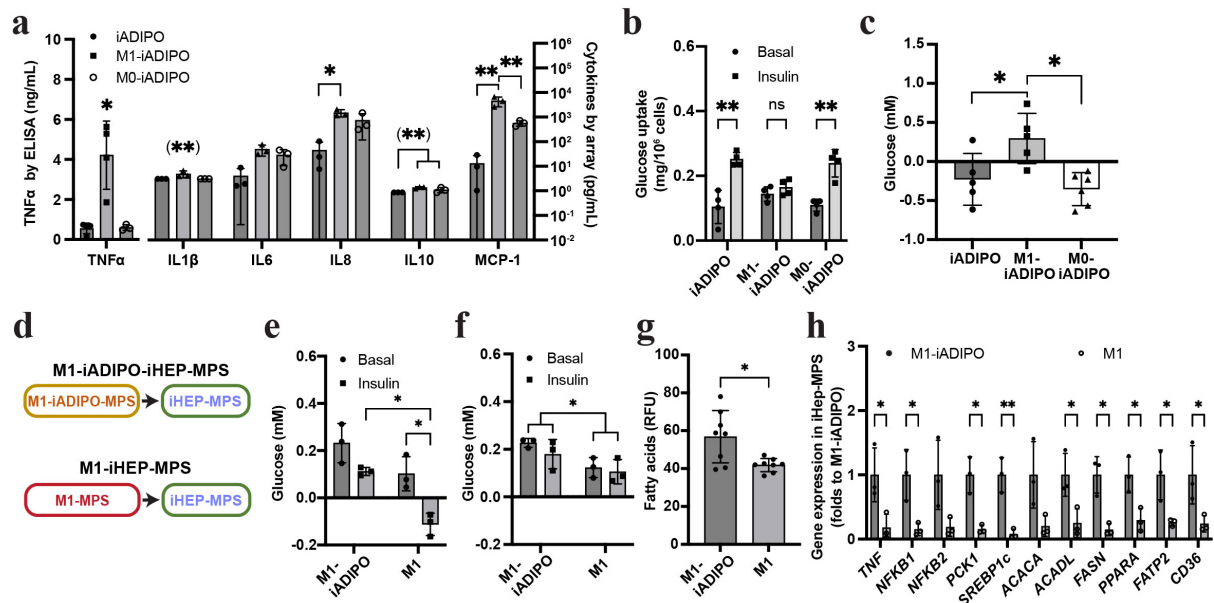

**Supplementary Figure 3. Specific effects of iMACs and iADIPOs on glucose and lipid metabolisms in iHEP-MPS.** (a) Cytokine levels in media circulating between iHEP-MPS and iADIPO-MPS without iMACs, with M1-iMACs or with M0-iMACs 48 hours after interconnection. n=3 except n=4 for iADIPO and M1-iADIPO TNF $\alpha$ . n referring to media. (\*\*) indicate values that were set to detection limit of the assay. (b) Glucose uptake in iADIPO-MPS cultured without iMACs, with M1-iMACs or with M0-iMACs for 48 hours. n=4 referring to media. (c) Glucose levels in media of insulin-stimulated iHEP-MPS after interconnection with iADIPO-MPS without iMACs, with M1-iMACs or with M0-iMACs for 48 hours. n=5 except n=6 for M0-iADIPO. n referring to media. (d) Schematic of interconnected MPS conditions with (top) or without (bottom) iADIPOs. (e,f) Glucose levels in circulating media 24 hours (e) and 48 hours (f) after interconnection. n=3 referring to media. (g,h) Basal lipid uptake (g) (n=8 referring to MPS) and gene expression (h) (n=3 referring to MPS) in iHEP-MPS after 48 hours of interconnection. p-values were determined by paired two-tailed t-test in (b,e,f) in Basal vs Insulin comparison, one-way ANOVA followed by Tukey's test in comparison of three conditions in (a,c) and two-way ANOVA then Tukey's test in cross-group comparison in (e), and unpaired two-tailed t-test in (g,h). The significance of iADIPO effectiveness in (f) was determined by ANOVA without post-hoc test. All data are mean  $\pm$  SD. \*p<0.05; \*\*p<0.005; ns, p>0.05. Statistical methods and exact p-values are shown in Supplementary Data 1. Source data are provided as Source Data file.

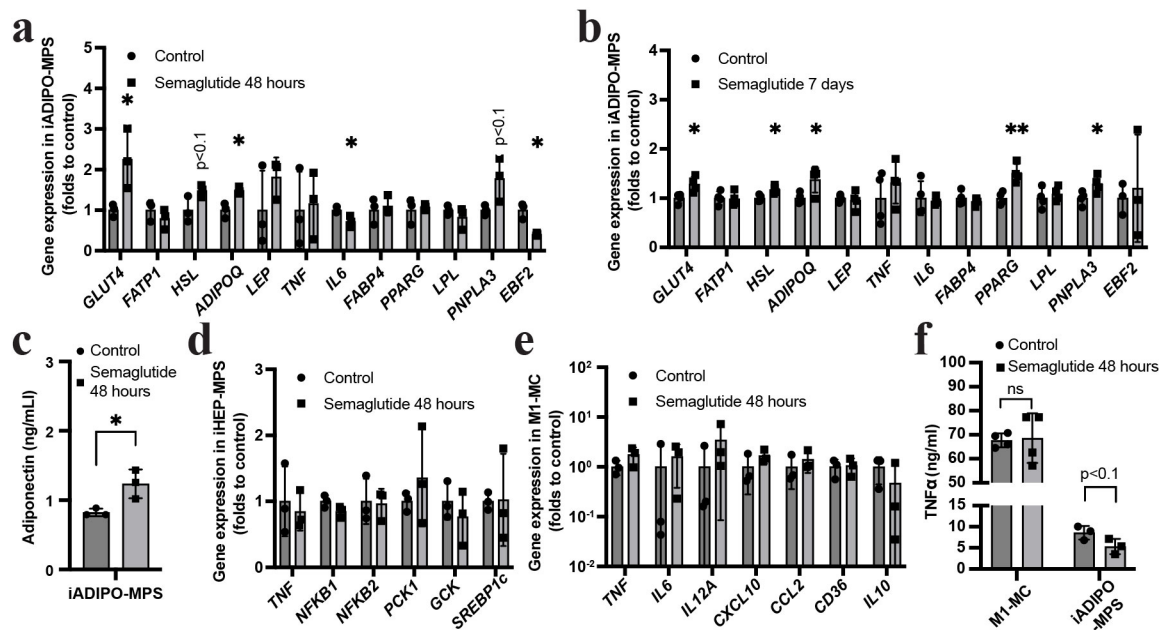

**Supplementary Figure 4. Effects of semaglutide treatment on individual cell types.** (a,b) Gene expression in iADIPO-MPS after 48 hours (a) (n=3 referring to MPS) and 7 days (b) (n=4 except n=3 for *EBF2* referring to MPS). (c) Adiponectin levels in circulating media. n=3 referring to media. (d,e) Gene expression in iHEP-MPS (d) (n=3 referring to MPS) and M1-iMACs in monoculture (MC; e) (n=3 referring to iMACs). (f) TNF $\alpha$  levels in circulating media. n=4 in M1-MC referring to wells and n=3 in iADIPO-MPS referring to MPS. p-values were determined by unpaired two-tailed t-test. \*p<0.05; \*\*p<0.005; ns, p>0.05. All data are mean  $\pm$  SD. Statistical methods and exact p-values are shown in Supplementary Data 1. Source data are provided as Source Data file.

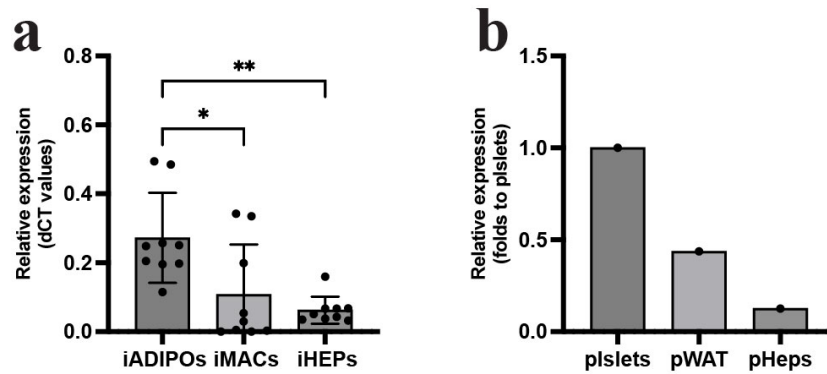

**Supplementary Figure 5. *GLPIR* expression in iPSC-derived and primary human cells.** (a) *GLPIR* gene expression in iPSC-derived cells. n=9 referring to MPS for iADIPOs and iHEPs, and to wells for iMACs. \*p<0.05; \*\*p<0.005. p-values were determined by one-way ANOVA followed by Tukey's test. (b) *GLPIR* gene expression in primary human pancreatic islets (pIslets), primary human WAT (pWAT) and primary human hepatocytes (pHeps). pWAT contains adipocytes, tissue-resident macrophages and other cell types. n=1 referring to cells/tissue. All data are mean  $\pm$  SD. Statistical methods and exact p-values are shown in Supplementary Data 1. Source data are provided as Source Data file.

**Supplementary Table 1. Primers for qRT-PCR.**

| Gene           | Direction | Sequence                 | Gene                  | Direction | Sequence                    |
|----------------|-----------|--------------------------|-----------------------|-----------|-----------------------------|
| <i>TNF</i>     | Forward   | CCTCTCTCTAATCAGCCCTCTG   | <i>GLUT4 (SLC2A4)</i> | Forward   | TCCAACAGAT AGGCTCCGAA       |
|                | Reserve   | GAGGACCTGGGAGTAGATGAG    |                       | Reserve   | CCCAATGTTGTACCCAAACTG       |
| <i>NFKB1</i>   | Forward   | CAGGAGACGTGAAGATGCTG     | <i>FATP1 (SLC27A)</i> | Forward   | AGTGTCTCATCTATGGGCTGA       |
|                | Reserve   | AGTTGAGAATGAAGGTGGATGA   |                       | Reserve   | AGGTAGCGGCAGATCTCC          |
| <i>NFKB2</i>   | Forward   | ATGGAGAGTTGCTACAACCCA    | <i>HSL (LIPE)</i>     | Forward   | AGTATGTCACGCTGCATAAGG       |
|                | Reserve   | CTGTTCCACGATCACCAGGTA    |                       | Reserve   | GAAGGACACCAGCCCAAT          |
| <i>PCK1</i>    | Forward   | TCATTTAAGGGCCATCAACC     | <i>ADIPOQ</i>         | Forward   | CCTCACTCCATTCTGACTGC        |
|                | Reserve   | CTCATCAATGCCTTCCAGT      |                       | Reserve   | AGCATCCTGAGCCCTGAT          |
| <i>G6PC</i>    | Forward   | ACTGGCTCAACCTCGTCTTTA    | <i>LEP</i>            | Forward   | TGGCTTCCAGGTATCTCCA         |
|                | Reserve   | CGGAAGTGTTGCTGTAGTAGTCA  |                       | Reserve   | AGAGTGGCTTAGAGGAGTCAG       |
| <i>GCK</i>     | Forward   | CCGCAAGCAGATCTACAACA     | <i>IL6</i>            | Forward   | GCAGATGAGTACAAAAGTCTCTGA    |
|                | Reserve   | AGCTTGTACACGGAGCCATC     |                       | Reserve   | TTCTGTGCCTGCAGCTTC          |
| <i>SREBP1c</i> | Forward   | CCATGGATTGCACCTTCGAA     | <i>IL10</i>           | Forward   | GCGCTGTCATCGATTTCTTC        |
|                | Reserve   | GGCCAGGGAAGTCACTGTCTT    |                       | Reserve   | TCACTCATGGCTTTGTAGATGC      |
| <i>ACACA</i>   | Forward   | CTGCCACATCTCATCCAAA      | <i>IL12A</i>          | Forward   | CAGTTATTGATGAGCTGATGCAG     |
|                | Reserve   | GTACATCGCTGACACTAGCTAC   |                       | Reserve   | CATGAAGAAGTATGCAGAGCTTG     |
| <i>ACACB</i>   | Forward   | GCCTATGAGATGTTCCGCAA     | <i>CCL2</i>           | Forward   | AGCAGCCACCTTCA TTCC         |
|                | Reserve   | CGTAATGATCCGCCATCTTGA    |                       | Reserve   | GCCTCTGCACTGAGATCTTC        |
| <i>ACADL</i>   | Forward   | GCAAT AGCAATGACAGAGCCT   | <i>CXCL10</i>         | Forward   | GACATATTCTGAGCCTACAGCA      |
|                | Reserve   | GCAACT ACAATCACAACATCACT |                       | Reserve   | CAGTTCT AGAGAGAGGT ACTCCT   |
| <i>FASN</i>    | Forward   | TTTGATGCCTCCTTCTCGG      | <i>CD36</i>           | Forward   | TCAATTCGTCTAATCATTTGGAAA GC |
|                | Reserve   | CGGAGTGAATCTGGGTTGATG    |                       | Reserve   | CCTGTTTACTTTCTGCATCTGC      |
| <i>CYP2E1</i>  | Forward   | AGCCAGAACACTTCTGAATG     | <i>PPARG</i>          | Forward   | GTTTCAGAAAATGCCTTGCAGT      |
|                | Reserve   | GCACACAACAAAAGAAACAACCTC |                       | Reserve   | GGATTCAGCTGGTTCGATATCAC     |
| <i>PPARA</i>   | Forward   | TGGCAAGACAAGCTCAGAAC     | <i>FABP4</i>          | Forward   | ACTTGTCTCCAGTGAAAACCTTG     |
|                | Reserve   | CGTCCTCATGACACTGAATC     |                       | Reserve   | ATCACATCCCCATTCACT          |
| <i>GLP1R</i>   | Forward   | TAACCTCAGCCAAAACACAGA    | <i>LPL</i>            | Forward   | AGTCAGAGCCAAAAGAAGCAG       |
|                | Reserve   | AAGCAACCCAGACACACAA      |                       | Reserve   | TTGGTATGGGTTTCACTCTCAG      |
| <i>PPLA</i>    | Forward   | GTGGCGGATTTGATCATTGG     | <i>PNPLA3</i>         | Forward   | CCTGGTATGTTCTGCTTCA         |
|                | Reserve   | CAAGACTGAGATGCACAAGTG    |                       | Reserve   | GTTGCTCACTCACTCCTCCATC      |
| <i>RPLP0</i>   | Forward   | GCAGATCCGCATGTCCCTT      | <i>EBF2</i>           | Forward   | CTATGTCAGGCTCATCGACTC       |
|                | Reserve   | TGTTTTCCAGGTGCCCTCG      |                       | Reserve   | CAGCATCGACT ACACATCACT      |

**Supplementary Table 2.** RNA yield from 1 well of a 6-well tissue culture plate and 1 MPS. Cells from 1 well of a 6-well plate can be loaded into approximately 4 MPS (ratio 1:4). Measurements are based on iHEPs.

| RNA yield ( $\mu\text{g/mL}$ ) | Isolated from |        |
|--------------------------------|---------------|--------|
|                                | 1 well        | 1 MPS  |
| Sample #                       |               |        |
| 1                              | 191           | 19.6   |
| 2                              | 269           | 27.8   |
| 3                              | 471           | 54.5   |
| 4                              | 393           | 51.7   |
| 5                              | 336           | 49.7   |
| 6                              | 269           | 49.1   |
| 7                              | 234           | 53     |
| 8                              | 270           | 27.2   |
| Average                        | 304.125       | 41.575 |
| Loading ratio                  | 1             | 4      |
| Total RNA                      | 304.125       | 166.3  |
| Net yield                      | N/A           | 54.68% |
