# Supplementary material for: Adipocyte inflammation is the primary driver of hepatic insulin resistance in a human iPSC-based microphysiological system
Source: PubMed Central journal article supplement (PMC11393072; doi:10.1038/s41467-024-52258-w), 2024-09-12
Supplement: 41467_2024_52258_MOESM3_ESM.pdf [file 41467_2024_52258_MOESM3_ESM.pdf]

### Description of Additional Supplementary File

**Supplementary Data 1:** Exact sample numbers (n) and detailed statistical analyses of all data, including test methods, p-values, two-side or one-side, paired or unpaired, correction methods in multiple comparison, degree of freedom, confidence intervals.
